# Supplementary material for: Developing and optimizing novel Cr3+-activated inorganic NIR phosphors by combining triple-objective optimization and crystal field engineering
Source: Royal Society of Chemistry journal article supplement (doi:10.1039/d3qi02120c), 2023-11-22
Supplement: d3qi02120c1.pdf [file d3qi02120c1.pdf]

## Supporting Information

# Developing and optimizing novel Cr<sup>3+</sup> activated inorganic NIR phosphors by combining triple- objective optimization and crystal field engineering

*Lipeng Jiang,<sup>a</sup> Xue Jiang,<sup>b,\*</sup> Mei Yang,<sup>a</sup> Xinpeng Zhao,<sup>a</sup> Changxin Wang,<sup>c</sup> Panpan Gao,<sup>d</sup> and Yanjing Su<sup>a,\*</sup>*

a. Beijing Advanced Innovation Center for Materials Genome Engineering, Corrosion and Protection Center, University of Science and Technology Beijing, Beijing, 100083, China.

b. Collaborative Innovation Center of Steel Technology, University of Science and Technology Beijing, 100083 Beijing, China.

c. AI for Science Institute, Beijing 100080, China.

d. Beijing Advanced Innovation Center for Materials Genome Engineering, Department of Physics, University of Science and Technology Beijing, Beijing 100083, China

\* Corresponding author. E-mail addresses: [jiangxue@ustb.edu.cn](mailto:jiangxue@ustb.edu.cn); [yjsu@ustb.edu.cn](mailto:yjsu@ustb.edu.cn) (Y. Su)

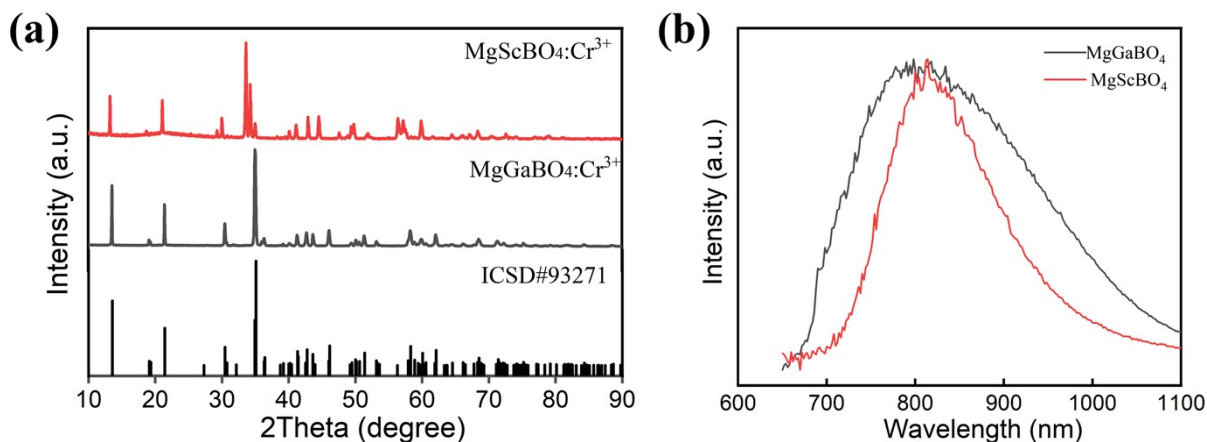

**Figure S1.** XRD patterns and emission spectra of MgMBO<sub>4</sub> (M = Ga, Sc).

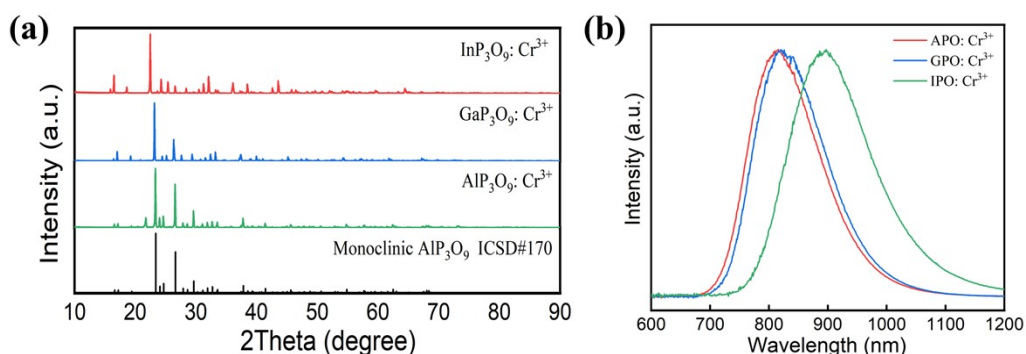

**Figure S2.** XRD patterns and emission spectra of MP<sub>3</sub>O<sub>9</sub>: Cr<sup>3+</sup> (M = Al, Ga, In).

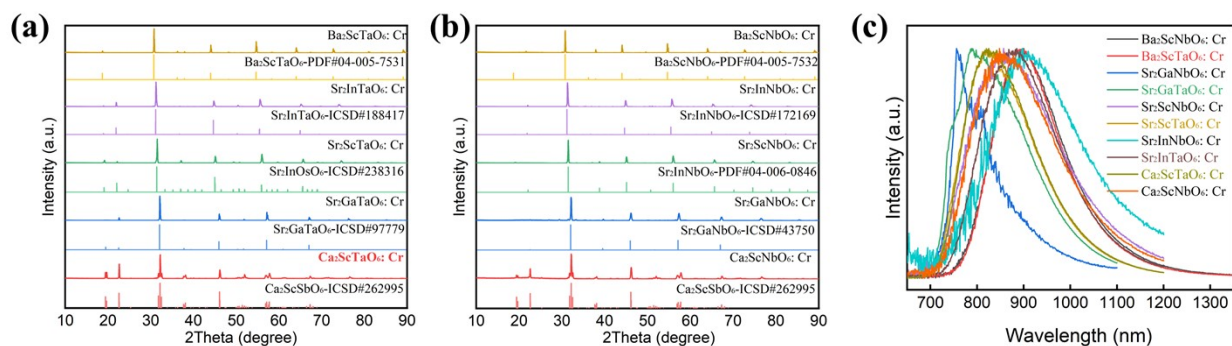

**Figure S3.** XRD patterns and emission spectra of A<sub>2</sub>MM'O<sub>6</sub>: Cr<sup>3+</sup> (A = Ca, Sr, Ba; M = Sc, In, Ga, Al; M' = Nb, Ta).

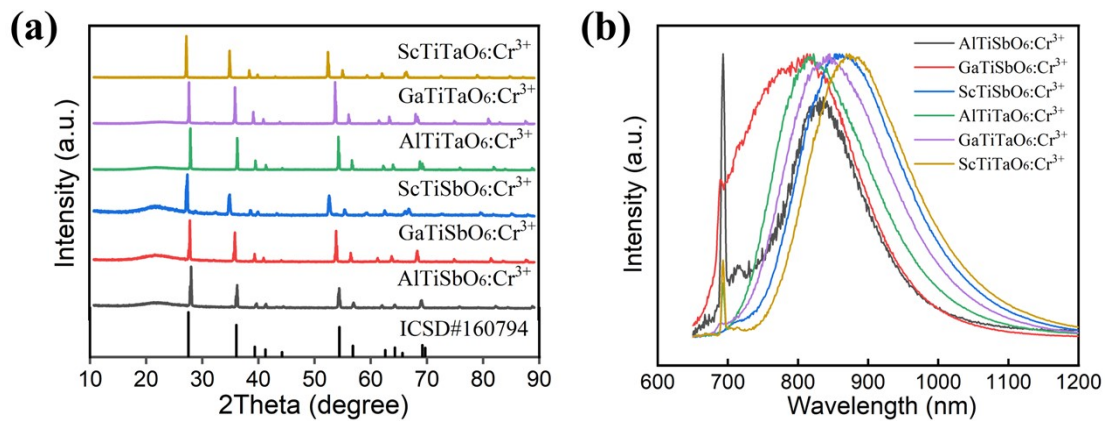

**Figure S4.** XRD patterns and emission spectra of MTiAO<sub>6</sub> (M = Al, Ga, Sc, A = Sb, Ta).

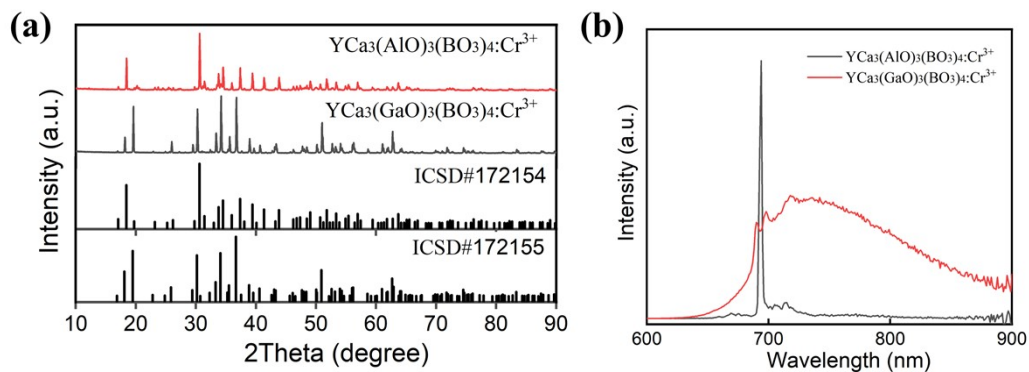

**Figure S5.** XRD patterns and emission spectra of Ca<sub>3</sub>Y(MO)<sub>3</sub>(BO<sub>3</sub>)<sub>4</sub> (M = Al, Ga).

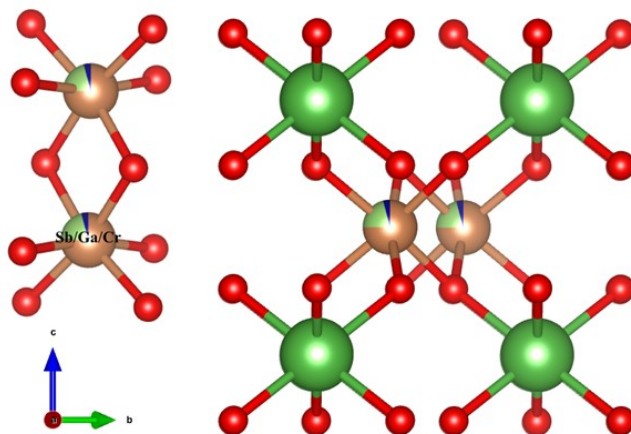

**Figure S6.** Crystal structure of LGS:Cr.

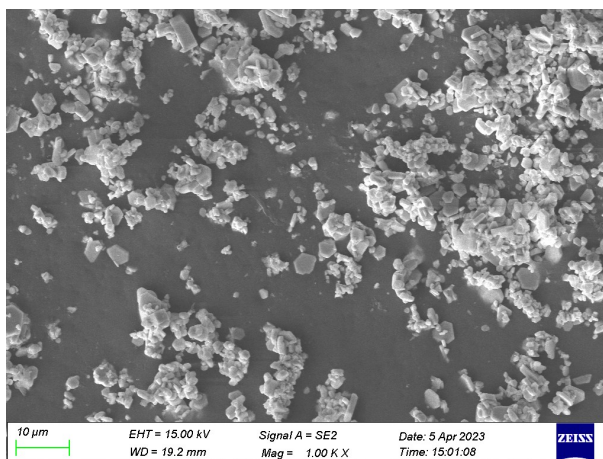

**Figure S7.** SEM image of LGS:0.04Cr<sup>3+</sup>.

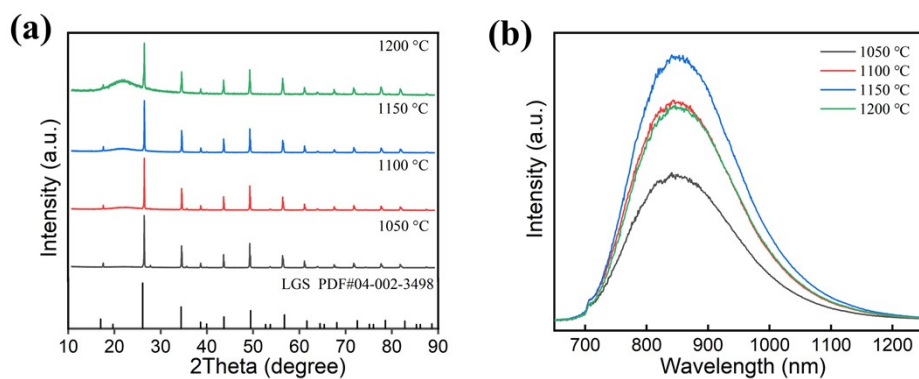

**Figure S8.** XRD patterns and emission spectra of LGS:0.04Cr<sup>3+</sup> at different synthesis temperature.

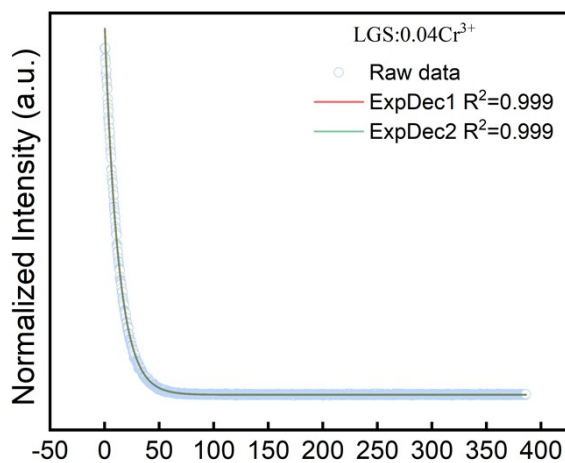

**Figure S9.** Fitting of decay curves using single and double exponential functions.

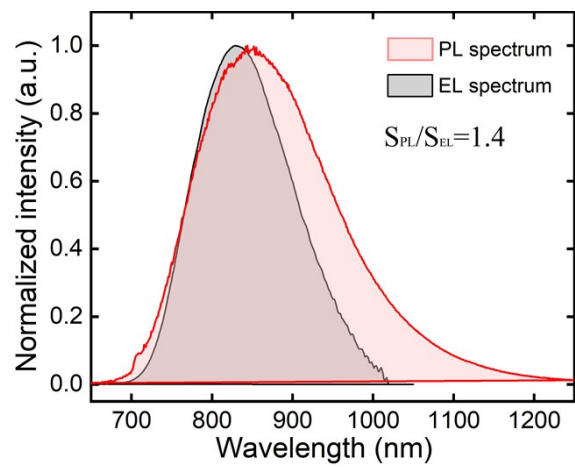

**Figure S10.** Comparison of EL and PL spectrum of LGS: Cr<sup>3+</sup> phosphors

**Table S1 IQE dataset.**

| <b>TIE</b> | <b>Va</b> | <b>Hf</b> | <b>Mb</b> | <b>IQE</b> | <b>Pretty formula</b>   | <b>DOI</b>                         |
|------------|-----------|-----------|-----------|------------|-------------------------|------------------------------------|
| 46.0065    | 1.6139    | 0.12705   | 13.175    | 91         | GdAl3B4O12              | 10.1039/d0tc04803h                 |
| 55.58571   | 1.929857  | 0.052357  | 7.628571  | 35         | Mg3Ga2GeO8              | 10.1021/acsaelm.9b00219            |
| 62.1723    | 2.4568    | 0.021     | 7.52      | 75         | Na3AlF6                 | 10.1021/acsaelm.9b00527            |
| 52.9454    | 2.1377    | 0.1235    | 5.28      | 45.9       | CaMgSi2O6               | 10.1016/j.materresbull.2021.111725 |
| 48.60287   | 2.201256  | 0.025144  | 2.746667  | 58.3       | Ca2LaZr2Ga2.8Al0.2O12   | 10.1021/acsaelm.1c01029            |
| 47.34836   | 2.289273  | 0.014818  | 6.836364  | 78.9       | KAIP2O7                 | 10.1021/acsaemi.2c00200            |
| 45.37654   | 1.82576   | 0.024208  | 0         | 87.9       | Ga1.96In0.04O3          | 10.1021/acsaemi.1c05949            |
| 54.5668    | 1.9082    | 0.1253    | 5.66      | 64         | LiScSi2O6               | 10.1021/acsaemi.1c23940            |
| 49.4677    | 2.0846    | 0.1249    | 5.66      | 22         | NaScSi2O6               | 10.1021/acsaemi.1c23940            |
| 57.50614   | 1.981429  | 0.076571  | 8.085714  | 26         | LiScGeO4                | 10.1021/acsaemi.1c10490            |
| 46.8812    | 2.1211    | 0.09      | 14.9      | 21         | CaScAlSiO6              | 10.1021/acs.chemmater.1c04131      |
| 47.55445   | 2.315364  | 0.01      | 0         | 74.4       | KGaP2O7                 | 10.1021/acs.chemmater.1c03671      |
| 46.91886   | 2.161214  | 0.134643  | 6.414286  | 7          | BaZrSi3O9               | 10.1039/d1qi01082d                 |
| 48.11857   | 2.103571  | 0.1245    | 4.957143  | 16         | BaSnSi3O9               | 10.1039/d1qi01082d                 |
| 46.94114   | 2.155     | 0.138     | 7.785714  | 13         | BaHfSi3O9               | 10.1039/d1qi01082d                 |
| 47.34485   | 1.767769  | 0.011538  | 5.784615  | 76         | AlP3O9                  | 10.1039/d2qi00046f                 |
| 46.43494   | 1.889563  | 0.026     | 1.1125    | 82.6       | LaMgGa11O19             | 10.1039/d0qi00063a                 |
| 45.398     | 1.8204    | 0.0244    | 0         | 92.4       | Ga2O3                   | 10.1039/d0tc02705g                 |
| 45.33131   | 1.767389  | 0.133461  | 7.6693    | 41         | Y0.57La0.72Sc2.71(BO3)4 | 10.1039/d1tc01508g                 |
| 54.8954    | 1.9199    | 0.1121    | 0         | 75         | LiInSi2O6               | 10.1016/j.cej.2019.123108          |
| 59.381     | 1.979429  | 0.074143  | 10.17143  | 48.19      | Mg2GeO4                 | 10.1039/d1tc00521a                 |
| 46.3112    | 1.7228    | 0.112     | 0         | 46.3       | InBO3                   | 10.1016/j.ceramint.2021.01.218     |
| 47.271     | 2.255     | 0.0452    | 12.54     | 58         | La2MgZrO6               | 10.1021/acs.chemmater.9b01587      |
| 45.654     | 1.6994    | 0.1384    | 11.32     | 65         | ScBO3                   | 10.1039/c8ra01084f                 |
| 55.041     | 1.9723    | 0.0739    | 0         | 81.2       | LiInGe2O6               | 10.1111/jace.17856                 |
| 46.88231   | 2.424769  | 0.024385  | 13.43077  | 48         | K2Ga2Sn6O16             | 10.1111/jace.17157                 |
| 54.7124    | 1.9606    | 0.0871    | 5.66      | 72.6       | LiSc1Ge2O6              | 10.1039/d1tc03057d                 |
| 48.9918    | 2.0549    | 0.0858    | 7.32      | 79         | Y3Mg2AlSi2O12           |                                    |
| 43.26765   | 2.08135   | 0.04435   | 5.66      | 83         | Y3Sc2Ga3O12             |                                    |
| 44.88845   | 2.0965    | 0.0427    | 9.11      | 59         | CaY2ZrAlGa3O12          |                                    |

|          |         |         |        |      |                     |  |
|----------|---------|---------|--------|------|---------------------|--|
| 46.1448  | 2.0046  | 0.0663  | 13.06  | 80   | Y3MgAlAl2SiO12      |  |
| 46.8057  | 1.9635  | 0.05105 | 9.3    | 94   | Y2MgGa2Al2GeO12     |  |
| 43.29735 | 2.08015 | 0.0421  | 11.345 | 72   | Gd3Sc2Ga3O12        |  |
| 46.8255  | 1.9627  | 0.04955 | 13.09  | 97   | Gd2MgAl2Ga2GeO12    |  |
| 43.5542  | 1.9818  | 0.03925 | 16.965 | 95   | Gd3Al3Ga2O12        |  |
| 43.98005 | 1.97085 | 0.05005 | 7.14   | 95   | Lu3Ga5O12           |  |
| 46.487   | 1.9781  | 0.0775  | 12.68  | 59   | Lu3MgAlGa2SiO12     |  |
| 44.4523  | 2.1474  | 0.0725  | 18.54  | 58   | Lu2SrSc2Al2SiO12    |  |
| 46.4428  | 2.2017  | 0.0631  | 11.42  | 2    | LuCa2ScZrGa2GeO12   |  |
| 43.4133  | 1.8991  | 0.0633  | 25.94  | 95   | Lu3Al5O12           |  |
| 48.3705  | 2.32615 | 0.0808  | 8.24   | 2    | Ca3Sc2Ge3O12        |  |
| 45.8089  | 2.1522  | 0.05375 | 23.875 | 26   | Ca2Gd1 Zr2Al3O12    |  |
| 46.51455 | 2.14535 | 0.063   | 16.11  | 50   | Ca2LuGaZrAl2GeO12   |  |
| 46.07195 | 2.2168  | 0.0439  | 10.7   | 13.6 | Ca2LaZr2Ga3O12      |  |
| 45.8687  | 2.1255  | 0.0647  | 26.28  | 44   | Ca2LuHf2Al3O12      |  |
| 46.4064  | 2.1886  | 0.07265 | 11.42  | 7    | LuCa2ScZrGa2SiO12   |  |
| 46.422   | 2.18425 | 0.075   | 12.38  | 20   | LuCa2ScHfGa2SiO12   |  |
| 46.4584  | 2.19735 | 0.06545 | 12.38  | 30   | LuCa2ScHfGa2GeO12   |  |
| 43.05085 | 2.05225 | 0.0489  | 15.075 | 82   | Y2GdSc2Al2GaO12     |  |
| 45.9597  | 2.0466  | 0.06905 | 12.13  | 60   | Y3ScMgAl2SiO12      |  |
| 46.2161  | 2.0741  | 0.0615  | 10.295 | 50   | Gd3ScMgGa2SiO12     |  |
| 46.3008  | 2.22815 | 0.0645  | 9.04   | 6    | Ca2LaZrScSiGa2O12   |  |
| 49.17795 | 2.09545 | 0.06405 | 3.56   | 45   | Y3Mg2GaGe2O12       |  |
| 44.8368  | 1.92425 | 0.07305 | 23.07  | 92   | Lu3Al4Mg0.5Si0.5O12 |  |
| 47.8036  | 2.26415 | 0.06825 | 11.56  | 8    | Ca3Zr2SiGa2O12      |  |
| 48.5556  | 2.28415 | 0.07805 | 9.17   | 1.5  | Ca3AlScGe3O12       |  |
| 47.84    | 2.27725 | 0.0587  | 11.56  | 2    | Ca3Zr2Ga2GeO12      |  |
| 46.2218  | 1.9678  | 0.0773  | 17.82  | 80   | YLu2Al3MgSiO12      |  |
| 47.1531  | 2.1749  | 0.0605  | 5.48   | 34   | Ca2YGa2AlGe2O12     |  |
| 46.4376  | 2.0452  | 0.0492  | 11.225 | 75.4 | Gd3MgAlGa2GeO12     |  |
| 49.20765 | 2.09425 | 0.0618  | 9.245  | 36.3 | Gd3Mg2GaGe2O12      |  |
| 49.0646  | 2.0811  | 0.0667  | 7.32   | 36.5 | Y3Mg2AlGe2O12       |  |

|          |         |         |       |      |                 |  |
|----------|---------|---------|-------|------|-----------------|--|
| 46.3383  | 2.0332  | 0.0707  | 11.75 | 72.5 | Lu3ScMgGa2GeO12 |  |
| 46.48485 | 2.04765 | 0.05835 | 1.78  | 80.2 | Y3Ga3MgSiO12    |  |

**Table S2 WL dataset.**

| <b>TIE</b> | <b>Va</b> | <b>WL</b> | <b>Pretty formula</b> | <b>DOI</b>                         |
|------------|-----------|-----------|-----------------------|------------------------------------|
| 46.0065    | 1.6139    | 740       | GdAl3B4O12            | 10.1039/d0tc04803h                 |
| 55.58571   | 1.929857  | 918       | Mg3Ga2GeO8            | 10.1021/acsaelm.9b00219            |
| 62.1723    | 2.4568    | 720       | Na3AlF6               | 10.1021/acsaelm.9b00527            |
| 49.00116   | 2.5116    | 870       | Sr8MgLa(PO4)7         | 10.1016/j.optmat.2018.09.001       |
| 52.9454    | 2.1377    | 822       | CaMgSi2O6             | 10.1016/j.materresbull.2021.111725 |
| 48.60287   | 2.201256  | 820       | Ca2LaZr2Ga2.8Al0.2O12 | 10.1021/acsaelm.1c01029            |
| 47.34836   | 2.289273  | 780       | KAlP2O7               | 10.1021/acsami.2c00200             |
| 45.37654   | 1.82576   | 810       | Ga1.96In0.04O3        | 10.1021/acsami.1c05949             |
| 54.5668    | 1.9082    | 845       | LiScSi2O6             | 10.1021/acsami.1c23940             |
| 49.4677    | 2.0846    | 845       | NaScSi2O6             | 10.1021/acsami.1c23940             |
| 47.55445   | 2.315364  | 815       | KGaP2O7               | 10.1021/acs.chemmater.1c03671      |
| 73.77667   | 1.946417  | 750       | Li3Mg2NbO6            | 10.1039/d1ce00746g                 |
| 45.50118   | 1.9507    | 764       | SrGa11.2Sc0.8O19      | 10.1039/d1dt03461h                 |
| 46.91886   | 2.161214  | 811       | BaZrSi3O9             | 10.1039/d1qi01082d                 |
| 48.11857   | 2.103571  | 806       | BaSnSi3O9             | 10.1039/d1qi01082d                 |
| 46.94114   | 2.155     | 822       | BaHfSi3O9             | 10.1039/d1qi01082d                 |
| 47.34485   | 1.767769  | 780       | AlP3O9                | 10.1039/d2qi00046f                 |
| 47.07486   | 2.217357  | 830       | BaZrGe3O9             | 10.1039/d0qi01524e                 |
| 46.43494   | 1.889563  | 770       | LaMgGa11O19           | 10.1039/d0qi00063a                 |
| 45.398     | 1.8204    | 714       | Ga2O3                 | 10.1039/d0tc02705g                 |
| 50.589     | 1.815778  | 834       | MgTa2O6               | 10.1039/d0tc01951h                 |
| 54.8954    | 1.9199    | 840       | LiInSi2O6             | 10.1016/j.cej.2019.123108          |
| 59.381     | 1.979429  | 940       | Mg2GeO4               | 10.1039/d1tc00521a                 |



|          |          |     |                  |                                |
|----------|----------|-----|------------------|--------------------------------|
| 46.3112  | 1.7228   | 820 | InBO3            | 10.1016/j.ceramint.2021.01.218 |
| 47.271   | 2.255    | 825 | La2MgZrO6        | 10.1021/acs.chemmater.9b01587  |
| 45.654   | 1.6994   | 800 | ScBO3            | 10.1039/c8ra01084f             |
| 48.8072  | 2.321    | 760 | CaTiO3           | 10.1016/j.jallcom.2016.01.135  |
| 53.7399  | 2.3592   | 800 | Ca2MgWO6         | 10.1016/j.jallcom.2017.10.036  |
| 55.041   | 1.9723   | 880 | LiInGe2O6        | 10.1016/j.jallcom.2017.10.036  |
| 54.7124  | 1.9606   | 886 | LiSc1Ge2O6       | 10.1039/d1tc03057d             |
| 46.04315 | 1.841538 | 850 | Ga4GeO8          | 10.1002/adom.202102229         |
| 45.56233 | 1.782    | 840 | GaTaO4           | 10.1002/adom.202101800         |
| 43.96555 | 2.156    | 770 | Gd2GaSbO7        | 10.1039/d1dt02259h             |
| 49.5935  | 2.4242   | 840 | Ca4ZrGe3O12      | 10.1039/d1qm01540k             |
| 48.31062 | 2.557533 | 860 | Sr9Sc(PO4)7      | 10.1021/acs.inorgchem.1c03377  |
| 74.11004 | 1.942885 | 814 | LiGe2(PO4)3      | 10.1016/j.jallcom.2022.163945  |
| 45.42019 | 2.6575   | 761 | Sr3Sc4O9         | 10.1016/j.jallcom.2022.16458   |
| 47.06008 | 1.832385 | 900 | Sc(PO3)3         | 10.1111/jace.18319             |
| 47.07486 | 2.217357 | 820 | BaZrGe3O9        | 10.1016/j.jlumin.2021.118084   |
| 45.8375  | 2.1342   | 780 | Ca2Lu1 Zr2Al3O12 | 10.1002/adom.201901684         |
| 43.38315 | 2.02615  | 707 | Lu3Sc2Ga3O12     | 10.1016/j.jlumin.2018.05.076   |
| 43.26765 | 2.08135  | 729 | Y3Sc2Ga3O12      | 10.1016/j.jlumin.2018.05.076   |
| 43.29735 | 2.08015  | 748 | Gd3Sc2Ga3O12     | 10.1016/j.jlumin.2018.05.076   |
| 43.06635 | 2.1448   | 818 | La3Sc2Ga3O12     | 10.1016/j.jlumin.2018.05.076   |
| 45.0757  | 2.03715  | 744 | Y2Ca1Al4Si1O12   | 10.1039/C9TC05775G             |
| 46.60035 | 2.1029   | 760 | Y1Ca2Al3Si2O12   | 10.1039/C9TC05775G             |
| 43.2978  | 1.9543   | 703 | Y3Al5O12         | 10.1039/C9TC05775G             |
| 45.8687  | 2.1255   | 782 | Ca2LuHf2Al3O12   | 10.1002/adom.201900185         |
| 52.3458  | 2.0616   | 776 | Mg3Y2Ge3O12      | 10.1016/j.ijleo.2021.166305    |
| 48.2613  | 2.28685  | 770 | Ca3Sc2Si3O12     | 10.1016/j.ceramint.2019.04.133 |
| 45.7631  | 2.16505  | 780 | Ca2LaHf2Al3O12   | 10.1039/d0dt03840g             |
| 45.8302  | 2.1439   | 775 | Ca2YHf2Al3O12    | 10.1039/d0tc05657j             |
| 47.0065  | 2.1985   | 804 | Ca2LuScGa2Ge2O12 | 10.1021/acs.inorgchem.0c01890  |

|          |         |     |                                                                                 |                               |
|----------|---------|-----|---------------------------------------------------------------------------------|-------------------------------|
| 43.76885 | 2.04995 | 787 | La <sub>2</sub> LuGa <sub>5</sub> O <sub>12</sub>                               | 10.1039/c9nj03167g            |
| 43.6555  | 2.0356  | 751 | La <sub>2</sub> LuAl <sub>1</sub> Ga <sub>4</sub> O <sub>12</sub>               | 10.1039/c9nj03167g            |
| 43.54215 | 2.02125 | 735 | La <sub>2</sub> LuAl <sub>2</sub> Ga <sub>3</sub> O <sub>12</sub>               | 10.1039/c9nj03167g            |
| 43.4288  | 2.0069  | 735 | La <sub>2</sub> LuAl <sub>3</sub> Ga <sub>2</sub> O <sub>12</sub>               | 10.1039/c9nj03167g            |
| 43.3275  | 1.9531  | 710 | Gd <sub>3</sub> Al <sub>5</sub> O <sub>12</sub>                                 | 10.1016/j.snb.2018.04.157     |
| 43.44085 | 1.96745 | 719 | Gd <sub>3</sub> Al <sub>4</sub> GaO <sub>12</sub>                               | 10.1016/j.snb.2018.04.157     |
| 43.66755 | 1.99615 | 735 | Gd <sub>3</sub> Al <sub>2</sub> Ga <sub>3</sub> O <sub>12</sub>                 | 10.1016/j.snb.2018.04.157     |
| 43.7809  | 2.0105  | 754 | Gd <sub>3</sub> AlGa <sub>4</sub> O <sub>12</sub>                               | 10.1016/j.snb.2018.04.157     |
| 43.89425 | 2.02485 | 756 | Gd <sub>3</sub> Ga <sub>5</sub> O <sub>12</sub>                                 | 10.1016/j.snb.2018.04.157     |
| 43.79806 | 1.9997  | 728 | Gd <sub>2.4</sub> Lu <sub>0.6</sub> Ga <sub>4</sub> AlO <sub>12</sub>           | 10.1016/j.cej.2021.132003     |
| 47.9451  | 2.40795 | 800 | Ca <sub>3</sub> Y <sub>2</sub> Ge <sub>3</sub> O <sub>12</sub>                  | 10.1016/j.jallcom.2021.158699 |
| 50.8467  | 2.10095 | 750 | CaLu <sub>2</sub> Mg <sub>2</sub> Si <sub>3</sub> O <sub>12</sub>               | 10.1002/adom.202100388        |
| 43.3899  | 2.05915 | 753 | Gd <sub>3</sub> ScAlGa <sub>3</sub> O <sub>12</sub>                             | 10.1002/adom.202000296        |
| 48.9918  | 2.0549  | 768 | Y <sub>3</sub> Mg <sub>2</sub> AlSi <sub>2</sub> O <sub>12</sub>                |                               |
| 43.26765 | 2.08135 | 748 | Y <sub>3</sub> Sc <sub>2</sub> Ga <sub>3</sub> O <sub>12</sub>                  |                               |
| 44.88845 | 2.0965  | 768 | CaY <sub>2</sub> ZrAlGa <sub>3</sub> O <sub>12</sub>                            |                               |
| 46.1448  | 2.0046  | 769 | Y <sub>3</sub> MgAlAl <sub>2</sub> SiO <sub>12</sub>                            |                               |
| 46.8057  | 1.9635  | 750 | Y <sub>2</sub> MgGa <sub>2</sub> Al <sub>2</sub> GeO <sub>12</sub>              |                               |
| 43.29735 | 2.08015 | 763 | Gd <sub>3</sub> Sc <sub>2</sub> Ga <sub>3</sub> O <sub>12</sub>                 |                               |
| 46.8255  | 1.9627  | 738 | Gd <sub>2</sub> MgAl <sub>2</sub> Ga <sub>2</sub> GeO <sub>12</sub>             |                               |
| 43.5542  | 1.9818  | 726 | Gd <sub>3</sub> Al <sub>3</sub> Ga <sub>2</sub> O <sub>12</sub>                 |                               |
| 43.98005 | 1.97085 | 705 | Lu <sub>3</sub> Ga <sub>5</sub> O <sub>12</sub>                                 |                               |
| 46.487   | 1.9781  | 769 | Lu <sub>3</sub> MgAlGa <sub>2</sub> SiO <sub>12</sub>                           |                               |
| 44.4523  | 2.1474  | 704 | Lu <sub>2</sub> SrSc <sub>2</sub> Al <sub>2</sub> SiO <sub>12</sub>             |                               |
| 46.4428  | 2.2017  | 816 | LuCa <sub>2</sub> ScZrGa <sub>2</sub> GeO <sub>12</sub>                         |                               |
| 43.4133  | 1.8991  | 704 | Lu <sub>3</sub> Al <sub>5</sub> O <sub>12</sub>                                 |                               |
| 48.3705  | 2.32615 | 792 | Ca <sub>3</sub> Sc <sub>2</sub> Ge <sub>3</sub> O <sub>12</sub>                 |                               |
| 45.8089  | 2.1522  | 806 | Ca <sub>2</sub> Gd <sub>1</sub> Zr <sub>2</sub> Al <sub>3</sub> O <sub>12</sub> |                               |
| 46.51455 | 2.14535 | 787 | Ca <sub>2</sub> LuGaZrAl <sub>2</sub> GeO <sub>12</sub>                         |                               |
| 46.07195 | 2.2168  | 776 | Ca <sub>2</sub> LaZr <sub>2</sub> Ga <sub>3</sub> O <sub>12</sub>               |                               |

|          |         |     |                                                                                     |  |
|----------|---------|-----|-------------------------------------------------------------------------------------|--|
| 45.8687  | 2.1255  | 789 | Ca <sub>2</sub> LuHf <sub>2</sub> Al <sub>3</sub> O <sub>12</sub>                   |  |
| 46.4064  | 2.1886  | 825 | LuCa <sub>2</sub> ScZrGa <sub>2</sub> SiO <sub>12</sub>                             |  |
| 46.422   | 2.18425 | 820 | LuCa <sub>2</sub> ScHfGa <sub>2</sub> SiO <sub>12</sub>                             |  |
| 46.4584  | 2.19735 | 820 | LuCa <sub>2</sub> ScHfGa <sub>2</sub> GeO <sub>12</sub>                             |  |
| 43.05085 | 2.05225 | 745 | Y <sub>2</sub> GdSc <sub>2</sub> Al <sub>2</sub> GaO <sub>12</sub>                  |  |
| 45.9597  | 2.0466  | 781 | Y <sub>3</sub> ScMgAl <sub>2</sub> SiO <sub>12</sub>                                |  |
| 46.2161  | 2.0741  | 818 | Gd <sub>3</sub> ScMgGa <sub>2</sub> SiO <sub>12</sub>                               |  |
| 46.3008  | 2.22815 | 818 | Ca <sub>2</sub> LaZrScSiGa <sub>2</sub> O <sub>12</sub>                             |  |
| 49.17795 | 2.09545 | 784 | Y <sub>3</sub> Mg <sub>2</sub> GaGe <sub>2</sub> O <sub>12</sub>                    |  |
| 44.8368  | 1.92425 | 706 | Lu <sub>3</sub> Al <sub>4</sub> Mg <sub>0.5</sub> Si <sub>0.5</sub> O <sub>12</sub> |  |
| 47.8036  | 2.26415 | 832 | Ca <sub>3</sub> Zr <sub>2</sub> SiGa <sub>2</sub> O <sub>12</sub>                   |  |
| 48.5556  | 2.28415 | 790 | Ca <sub>3</sub> AlScGe <sub>3</sub> O <sub>12</sub>                                 |  |
| 47.84    | 2.27725 | 830 | Ca <sub>3</sub> Zr <sub>2</sub> Ga <sub>2</sub> GeO <sub>12</sub>                   |  |
| 46.2218  | 1.9678  | 734 | YLu <sub>2</sub> Al <sub>3</sub> MgSiO <sub>12</sub>                                |  |
| 47.1531  | 2.1749  | 790 | Ca <sub>2</sub> YGa <sub>2</sub> AlGe <sub>2</sub> O <sub>12</sub>                  |  |
| 46.4376  | 2.0452  | 782 | Gd <sub>3</sub> MgAlGa <sub>2</sub> GeO <sub>12</sub>                               |  |
| 49.20765 | 2.09425 | 805 | Gd <sub>3</sub> Mg <sub>2</sub> GaGe <sub>2</sub> O <sub>12</sub>                   |  |
| 49.0646  | 2.0811  | 771 | Y <sub>3</sub> Mg <sub>2</sub> AlGe <sub>2</sub> O <sub>12</sub>                    |  |
| 46.3383  | 2.0332  | 770 | Lu <sub>3</sub> ScMgGa <sub>2</sub> GeO <sub>12</sub>                               |  |
| 46.48485 | 2.04765 | 774 | Y <sub>3</sub> Ga <sub>3</sub> MgSiO <sub>12</sub>                                  |  |

**Table S3 TS dataset.**

| IR       | TIE      | Va       | TS | Pretty formula                                                                        | DOI                                |
|----------|----------|----------|----|---------------------------------------------------------------------------------------|------------------------------------|
| 0.352143 | 55.58571 | 1.929857 | 55 | Mg <sub>3</sub> Ga <sub>2</sub> GeO <sub>8</sub>                                      | 10.1021/acsaelm.9b00219            |
| 0.8395   | 62.1723  | 2.4568   | 70 | Na <sub>3</sub> AlF <sub>6</sub>                                                      | 10.1021/acsaelm.9b00527            |
| 0.312    | 52.9454  | 2.1377   | 72 | CaMgSi <sub>2</sub> O <sub>6</sub>                                                    | 10.1016/j.materresbull.2021.111725 |
| 0.35864  | 45.6876  | 2.09064  | 70 | La <sub>3</sub> GaGe <sub>5</sub> O <sub>16</sub>                                     | 10.1039/c4ra09793a                 |
| 0.3375   | 48.60287 | 2.201256 | 36 | Ca <sub>2</sub> LaZr <sub>2</sub> Ga <sub>2.8</sub> Al <sub>0.2</sub> O <sub>12</sub> | 10.1021/acsaelm.1c01029            |
| 0.317727 | 47.34836 | 2.289273 | 77 | KAlP <sub>2</sub> O <sub>7</sub>                                                      | 10.1021/acsaemi.2c00200            |

|          |          |          |    |                                                                                 |                                |
|----------|----------|----------|----|---------------------------------------------------------------------------------|--------------------------------|
| 0.30944  | 45.37654 | 1.82576  | 60 | Ga <sub>1.96</sub> In <sub>0.04</sub> O <sub>3</sub>                            | 10.1021/acsami.1c05949         |
| 0.2905   | 54.5668  | 1.9082   | 75 | LiScSi <sub>2</sub> O <sub>6</sub>                                              | 10.1021/acsami.1c23940         |
| 0.3165   | 49.4677  | 2.0846   | 69 | NaScSi <sub>2</sub> O <sub>6</sub>                                              | 10.1021/acsami.1c23940         |
| 0.376429 | 57.50614 | 1.981429 | 10 | LiScGeO <sub>4</sub>                                                            | 10.1021/acsami.1c10490         |
| 0.328    | 46.8812  | 2.1211   | 30 | CaScAlSiO <sub>6</sub>                                                          | 10.1021/acs.chemmater.1c04131  |
| 0.325455 | 47.55445 | 2.315364 | 56 | KGaP <sub>2</sub> O <sub>7</sub>                                                | 10.1021/acs.chemmater.1c03671  |
| 0.42     | 73.77667 | 1.946417 | 20 | Li <sub>3</sub> Mg <sub>2</sub> NbO <sub>6</sub>                                | 10.1039/d1ce00746g             |
| 0.331875 | 45.50118 | 1.9507   | 80 | SrGa <sub>11.2</sub> Sc <sub>0.8</sub> O <sub>19</sub>                          | 10.1039/d1dt03461h             |
| 0.297857 | 46.91886 | 2.161214 | 59 | BaZrSi <sub>3</sub> O <sub>9</sub>                                              | 10.1039/d1qi01082d             |
| 0.299286 | 48.11857 | 2.103571 | 38 | BaSnSi <sub>3</sub> O <sub>9</sub>                                              | 10.1039/d1qi01082d             |
| 0.297143 | 46.94114 | 2.155    | 43 | BaHfSi <sub>3</sub> O <sub>9</sub>                                              | 10.1039/d1qi01082d             |
| 0.368571 | 47.07486 | 2.217357 | 53 | BaZrGe <sub>3</sub> O <sub>9</sub>                                              | 10.1039/d0qi01524e             |
| 0.32725  | 46.43494 | 1.889563 | 85 | LaMgGa <sub>11</sub> O <sub>19</sub>                                            | 10.1039/d0qi00063a             |
| 0.296    | 54.8954  | 1.9199   | 77 | LiInSi <sub>2</sub> O <sub>6</sub>                                              | 10.1016/j.cej.2019.123108      |
| 0.367143 | 59.381   | 1.979429 | 8  | Mg <sub>2</sub> GeO <sub>4</sub>                                                | 10.1039/d1tc00521a             |
| 0.274    | 46.3112  | 1.7228   | 55 | InBO <sub>3</sub>                                                               | 10.1016/j.ceramint.2021.01.218 |
| 0.263    | 45.654   | 1.6994   | 49 | ScBO <sub>3</sub>                                                               | 10.1039/c8ra01084f             |
| 0.362    | 55.041   | 1.9723   | 22 | LiInGe <sub>2</sub> O <sub>6</sub>                                              | 10.1016/j.jallcom.2017.10.036  |
| 0.308462 | 46.04315 | 1.841538 | 56 | Ga <sub>4</sub> GeO <sub>8</sub>                                                | 10.1002/adom.202102229         |
| 0.29     | 45.56233 | 1.782    | 60 | GaTaO <sub>4</sub>                                                              | 10.1002/adom.202101800         |
| 0.359636 | 43.96555 | 2.156    | 50 | Gd <sub>2</sub> GaSbO <sub>7</sub>                                              | 10.1039/d1dt02259h             |
| 0.4055   | 49.5935  | 2.4242   | 45 | Ca <sub>4</sub> ZrGe <sub>3</sub> O <sub>12</sub>                               | 10.1039/d1qm01540k             |
| 0.416154 | 74.11004 | 1.942885 | 10 | LiGe <sub>2</sub> (PO <sub>4</sub> ) <sub>3</sub>                               | 10.1016/j.jallcom.2022.163945  |
| 0.46375  | 45.42019 | 2.6575   | 40 | Sr <sub>3</sub> Sc <sub>4</sub> O <sub>9</sub>                                  | 10.1016/j.jallcom.2022.16458   |
| 0.228077 | 47.06008 | 1.832385 | 30 | Sc(PO <sub>3</sub> ) <sub>3</sub>                                               | 10.1111/jace.18319             |
| 0.368571 | 47.07486 | 2.217357 | 40 | BaZrGe <sub>3</sub> O <sub>9</sub>                                              | 10.1016/j.jlumin.2021.118084   |
| 0.3553   | 45.8375  | 2.1342   | 66 | Ca <sub>2</sub> Lu <sub>1</sub> Zr <sub>2</sub> Al <sub>3</sub> O <sub>12</sub> | 10.1002/adom.201901684         |
| 0.3823   | 43.06635 | 2.1448   | 68 | La <sub>3</sub> Sc <sub>2</sub> Ga <sub>3</sub> O <sub>12</sub>                 | 10.1016/j.jlumin.2018.05.076   |
| 0.327    | 45.0757  | 2.03715  | 86 | Y <sub>2</sub> Ca <sub>1</sub> Al <sub>4</sub> Si <sub>1</sub> O <sub>12</sub>  | 10.1039/C9TC05775G             |
| 0.3543   | 45.8687  | 2.1255   | 60 | Ca <sub>2</sub> LuHf <sub>2</sub> Al <sub>3</sub> O <sub>12</sub>               | 10.1002/adom.201900185         |

|         |          |         |      |                    |                                |
|---------|----------|---------|------|--------------------|--------------------------------|
| 0.3445  | 48.2613  | 2.28685 | 50   | Ca3Sc2Si3O12       | 10.1016/j.ceramint.2019.04.133 |
| 0.36285 | 45.7631  | 2.16505 | 60   | Ca2LaHf2Al3O12     | 10.1039/d0dt03840g             |
| 0.35625 | 45.8302  | 2.1439  | 80   | Ca2YHf2Al3O12      | 10.1039/d0tc05657j             |
| 0.3753  | 47.0065  | 2.1985  | 59   | Ca2LuScGa2Ge2O12   | 10.1021/acs.inorgchem.0c01890  |
| 0.34914 | 43.79806 | 1.9997  | 75   | Gd2.4Lu0.6Ga4AlO12 | 10.1016/j.cej.2021.132003      |
| 0.3281  | 50.8467  | 2.10095 | 70   | CaLu2Mg2Si3O12     | 10.1002/adom.202100388         |
| 0.36295 | 43.3899  | 2.05915 | 86   | Gd3ScAlGa3O12      |                                |
| 0.33375 | 48.9918  | 2.0549  | 84.2 | Y3Mg2AlSi2O12      |                                |
| 0.35595 | 46.2161  | 2.0741  | 63   | Gd3ScMgGa2SiO12    |                                |
| 0.36195 | 46.4376  | 2.0452  | 78   | Gd3MgAlGa2GeO12    |                                |
| 0.3767  | 49.20765 | 2.09425 | 51   | Gd3Mg2GaGe2O12     |                                |

**Table S4.** Element features.

| No. | Features                              | Abbreviations | Calculation formula          |
|-----|---------------------------------------|---------------|------------------------------|
| 1   | polarizability                        | P             | $avg \bar{f} = \sum f_i x_i$ |
| 2   | ionic radius (shannon)                | IR            |                              |
| 3   | modulus rigidity                      | Mr            |                              |
| 4   | thermal conductivity                  | Tc            |                              |
| 5   | covalent radii                        | CR            |                              |
| 6   | first ionization energy               | FIE           |                              |
| 7   | second ionization energy              | SIE           |                              |
| 8   | third ionization energy               | TIE           |                              |
| 9   | electronic affinity                   | AE            |                              |
| 10  | fusion enthalpy                       | Hf            |                              |
| 11  | cohesive energy (Brewer)              | CEB           |                              |
| 12  | valence electron number               | VEC           |                              |
| 13  | periodic number                       | Pn            |                              |
| 14  | modulus bulk                          | Mb            |                              |
| 15  | atomic volume(villars,daams)          | Va            |                              |
| 16  | atomic weight(villars,daams)          | Ar            |                              |
| 17  | molar volume                          | Mv            |                              |
| 18  | electronegativity (martynov&batsanov) | En            |                              |

**Table S5.** Spectroscopic parameters of  $\text{LnA}_m\text{B}_{2-m}\text{O}_6: \text{Cr}^{3+}$  phosphor.

| Materials                                                    | $\lambda_{\text{ex}}$ (nm) | $\lambda_{\text{em}}$ (nm) | FWHM (nm) |
|--------------------------------------------------------------|----------------------------|----------------------------|-----------|
| $\text{LaAl}_{0.5}\text{Sb}_{1.5}\text{O}_6: \text{Cr}^{3+}$ | 437, 608                   | 851                        | 200       |
| $\text{LaGa}_{0.5}\text{Sb}_{1.5}\text{O}_6: \text{Cr}^{3+}$ | 445, 618                   | 851                        | 200       |
| $\text{LaIn}_{0.5}\text{Sb}_{1.5}\text{O}_6: \text{Cr}^{3+}$ | 451, 631                   | 867                        | 204       |
| $\text{LaMg}_{1/3}\text{Sb}_{5/3}\text{O}_6: \text{Cr}^{3+}$ | 445, 621                   | 874                        | 203       |
| $\text{GdGa}_{0.5}\text{Sb}_{1.5}\text{O}_6: \text{Cr}^{3+}$ | 446, 602                   | 703, 780                   | 175       |
| $\text{GdAl}_{0.5}\text{Sb}_{1.5}\text{O}_6: \text{Cr}^{3+}$ | 443, 599                   | 703, 777                   | 147       |
| $\text{LaGaTeO}_6: \text{Cr}^{3+}$                           | 430, 598                   | 717, 780                   | 151       |
| $\text{LaAlTeO}_6: \text{Cr}^{3+}$                           | 429, 581                   | 722                        | 105       |

**Table S6.** Atom positions of  $\text{LGS}:0.04\text{Cr}^{3+}$ .

| x    | Atom | x        | y        | z        | Multiplicity<br>& Wyckoff | Occ  | Uiso    |
|------|------|----------|----------|----------|---------------------------|------|---------|
| 0.04 | La1  | 0        | 0        | 0        | 1                         | 1    | 0.01169 |
|      | Ga1  | 0.333333 | 0.666667 | 0.5      | 2                         | 0.23 | 0.00412 |
|      | Sb1  | 0.333333 | 0.666667 | 0.5      | 2                         | 0.75 | 0.00412 |
|      | O1   | 0.368657 | 0        | 0.263036 | 6                         | 1    | 0.00169 |
|      | Cr1  | 0.333333 | 0.666667 | 0.5      | 2                         | 0.02 | 0.00412 |

**Table S7.** Measured element ratios of  $\text{LGS}: 0.04\text{Cr}^{3+}$ .

| Element | La    | O     | Sb    | Ga   | Cr   |
|---------|-------|-------|-------|------|------|
| Atom %  | 12.23 | 63.45 | 18.49 | 5.16 | 0.67 |

### Calculation of Dq/B, Equation S1:

$$10 \cdot D_q = E_a(^4T_{2g})$$

$$\frac{D_q}{B} = \frac{15 \cdot (x - 8)}{x^2 - 10 \cdot x}$$

$$D_q \cdot x = E_a(^4T_{1g}) - E_a(^4T_{2g}) \quad (\text{S1})$$

where  $E_a(^4T_{1g})$  and  $E_a(^4T_{2g})$  stand for the energy positions of  $^4T_{1g}$  and  $^4T_{2g}$ . The relationship between Stokes shift and bandwidth was also considered, and  $E_a(^4T_{2g})$  was determined as the average of the peak energies of the  $^4A_{2g} \rightarrow ^4T_{2g}$  excitation band and  $^4T_{2g} \rightarrow ^4A_{2g}$  emission band in this work.

### Calculation of activation energy, Equation S2:

$$I_T = \frac{I_0}{1 + C \exp(-\Delta E/kT)} \quad (\text{S2})$$

where  $I_T$  is the emission intensity of the sample at temperature T,  $I_0$  is the initial emission intensity, k represents the Boltzmann constant ( $8.617 \times 10^{-5}$  eV K<sup>-1</sup>), and C is a constant.  $\Delta E$  is the activation energy, which can be obtained by linearly fitting  $\ln(I_0/I_T)$  with  $1/KT$ .
